# Supplementary figures and images for: Dendritic normalisation improves learning in sparsely connected artificial neural networks
Source: PLOS journal article supplement (doi:10.1371/journal.pcbi.1009202), 2021-08-09

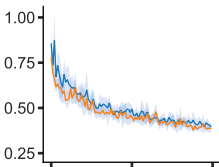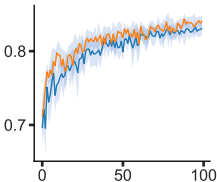

Supplement: S2 (10.1371/journal.pcbi.1009202.s002) [file journal.pcbi.1009202.s002.zip]

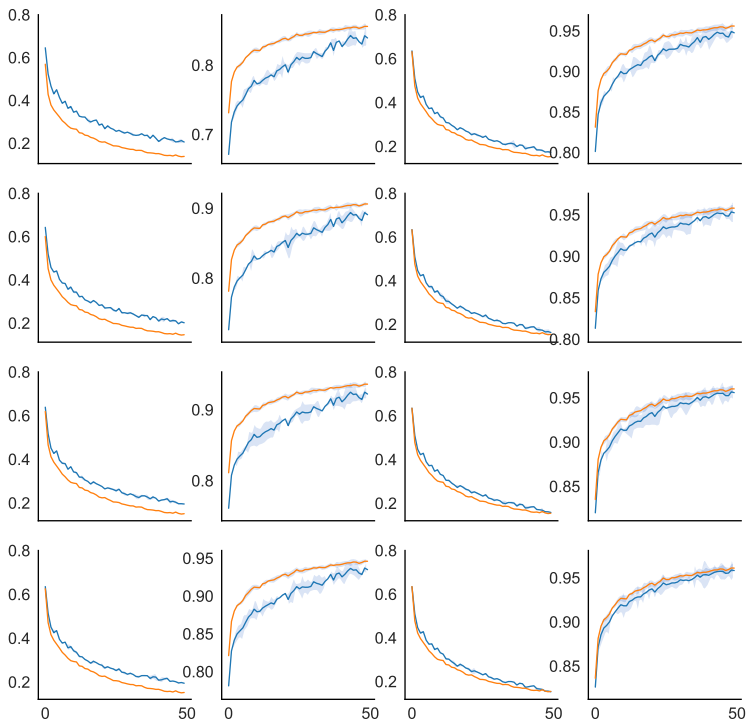

Supplement: S2 (10.1371/journal.pcbi.1009202.s002) [file journal.pcbi.1009202.s002.zip]

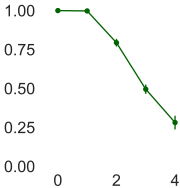

Supplement: S2 (10.1371/journal.pcbi.1009202.s002) [file journal.pcbi.1009202.s002.zip]

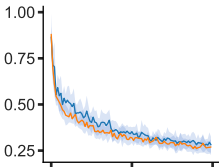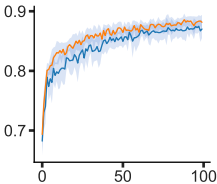

Supplement: S2 (10.1371/journal.pcbi.1009202.s002) [file journal.pcbi.1009202.s002.zip]

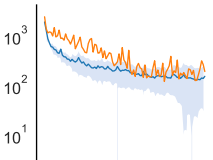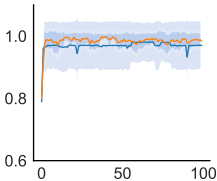

Supplement: S2 (10.1371/journal.pcbi.1009202.s002) [file journal.pcbi.1009202.s002.zip]

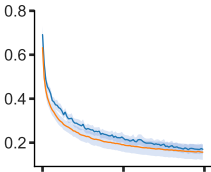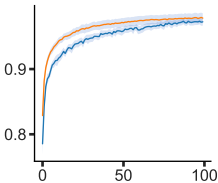

Supplement: S2 (10.1371/journal.pcbi.1009202.s002) [file journal.pcbi.1009202.s002.zip]

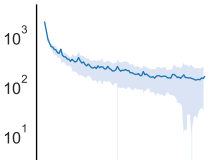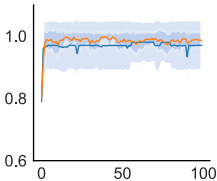

Supplement: S2 (10.1371/journal.pcbi.1009202.s002) [file journal.pcbi.1009202.s002.zip]

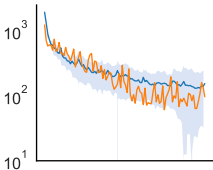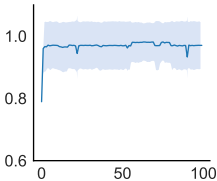

Supplement: S2 (10.1371/journal.pcbi.1009202.s002) [file journal.pcbi.1009202.s002.zip]

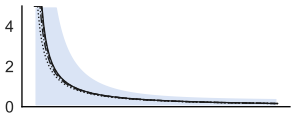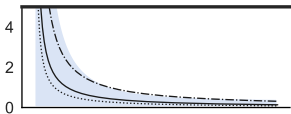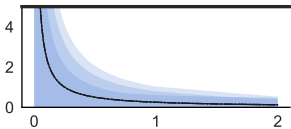

Supplement: S2 (10.1371/journal.pcbi.1009202.s002) [file journal.pcbi.1009202.s002.zip]

0.20

0.15

0.10

0.05

0.00

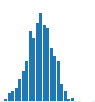

0.20

0.15

0.10

0.05

0.00

0

20

40

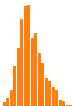

Supplement: S2 (10.1371/journal.pcbi.1009202.s002) [file journal.pcbi.1009202.s002.zip]

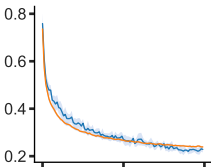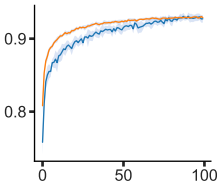

Supplement: S2 (10.1371/journal.pcbi.1009202.s002) [file journal.pcbi.1009202.s002.zip]

0.20

0.15

0.10

0.05

0.00

0.20

0.15

0.10

0.05

0.00

0

20

40

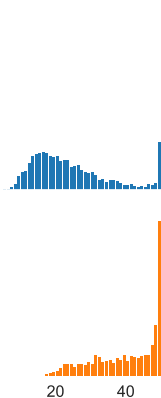

Supplement: S2 (10.1371/journal.pcbi.1009202.s002) [file journal.pcbi.1009202.s002.zip]

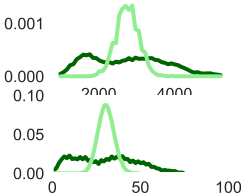

Supplement: S2 (10.1371/journal.pcbi.1009202.s002) [file journal.pcbi.1009202.s002.zip]

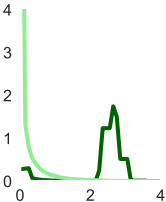

Supplement: S2 (10.1371/journal.pcbi.1009202.s002) [file journal.pcbi.1009202.s002.zip]

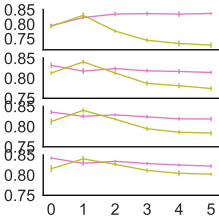

Supplement: S2 (10.1371/journal.pcbi.1009202.s002) [file journal.pcbi.1009202.s002.zip]

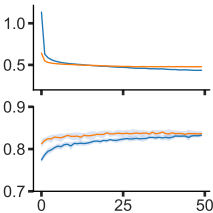

Supplement: S2 (10.1371/journal.pcbi.1009202.s002) [file journal.pcbi.1009202.s002.zip]

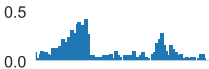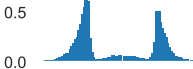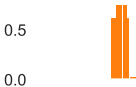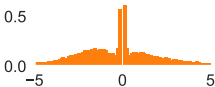

Supplement: S2 (10.1371/journal.pcbi.1009202.s002) [file journal.pcbi.1009202.s002.zip]

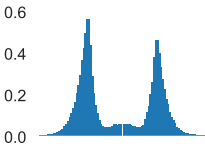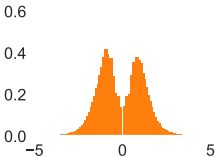

Supplement: S2 (10.1371/journal.pcbi.1009202.s002) [file journal.pcbi.1009202.s002.zip]

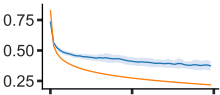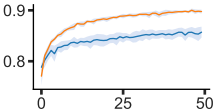

Supplement: S2 (10.1371/journal.pcbi.1009202.s002) [file journal.pcbi.1009202.s002.zip]

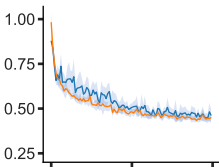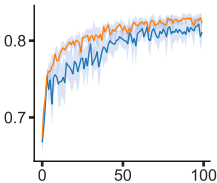

Supplement: S2 (10.1371/journal.pcbi.1009202.s002) [file journal.pcbi.1009202.s002.zip]

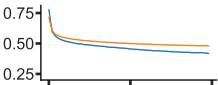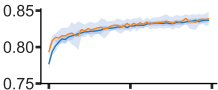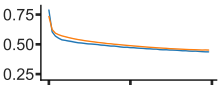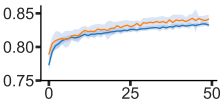

Supplement: S2 (10.1371/journal.pcbi.1009202.s002) [file journal.pcbi.1009202.s002.zip]

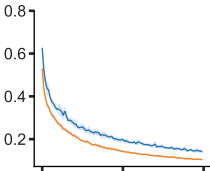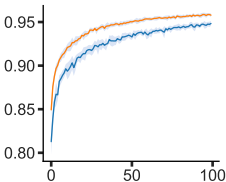

Supplement: S2 (10.1371/journal.pcbi.1009202.s002) [file journal.pcbi.1009202.s002.zip]

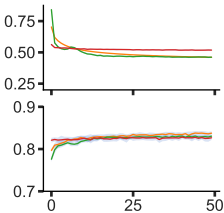

Supplement: S2 (10.1371/journal.pcbi.1009202.s002) [file journal.pcbi.1009202.s002.zip]
